# Supplementary material for: Evidence for Restriction of Ancient Primate Gammaretroviruses by APOBEC3 but Not TRIM5α Proteins
Source: PubMed Central journal article supplement (PMC2564838; doi:10.1371/journal.ppat.1000181), 2008-10-17
Supplement: ppat.1000181.s001.pdf [file ppat.1000181.s001.pdf]

## Dataset S1

### CA-NTD amino acid sequences

#### CERV1 (consensus)

PLREIGPPDDTGIPRLQYWPFSTSDLYNWKTQSARFSDNPKDLLALLDSVMFTHQPT  
WDDCQQLLRILFTTEERERIEARKLVPGGDGQPTANPDLINATFPLTRPAWDYNT  
AEGRRLHLYRQTLMAGLRAAARK

#### CERV1#23

PLREIGPPDDTGIPRLQYWPFSTSDLYNWKTQSARFSDNPKDLLALLDSVMFTHQPT  
WDDCQQLLRILFTTEERERIEARKLVPGGDGQPTANPDLINATFPLTRPAWDYNT  
AEGRQLHLYRQTLMAGLRAAARK

#### CERV1#34

PLREIGPPDDTGIPRLQYWPFSTSDLYNWKTQSARFSDNPKDLLALLDSVMFTHQPT  
WDDCQQLLRILFTTEERERIEARKLVPGGDSQPTANPDLINATFPLTRPAWDYNTA  
EGRRLHLYRQTLMAGLRAAARK

#### CERV1#46

PLREIGPPDDTGIPRLQYWPFSTSDLYNWKTQSARFSDNPKDLLALLDSVMFTHQPT  
WDDCQQLLRILFTTEERERIEARKLVPEDDGQPTANPDLINATFPLTRPAWDYNTA  
EGRRLHLYRQTLMAGLRAAARK

#### CERV1#137

PLREIGPPDDTGIPRLQYWPFSTSDLYNWKTQSARFSDNPKDLLALLDSVMFTHQPT  
WDDCQQLLRILFTTEERERIEARKLVPGGDGQPTANPDLINATFPLTRPAWDYNTM  
AEGRRLHLYRQTLMAGLRAAARK

#### CERV1#319

PLREIGPPDDTGIPRLQYWPFSTSDLYNWKSQSARFSDNPKDLLALLDSVMFTHQPT  
WDDCQQLLRILFTTEERERIEARKLVGGDGQPTANPDLINATFPLTRPAWDYNT  
AEGRRLHLYRQTLMAGLRAAARK

RhERV1a (consensus)

PLREIGPPDDTGIPRLQYWPFSTSDLYNWKTQSARFSDNPKDLLALLDSVMFTHQPT  
WDDCQQLLRILFTTEERERIQVEARKLVPGDDGQPTANPDLINATFPLTRPAWDYNT  
AEGRGRLLHLYRQTLMAGLRAAARK

RhERV1a#168

PLREIGPPDDTGIPRLQYWPFSTSDLYNWKTQSARFSDNPKDLSLLDSVMFTHQPT  
WDDCQQLLRILFTTEERERIQVEARKLVPGDDGQPTANPDLINATFPLTRPAWDYNT  
AEGRGRLLRLYRQTLMAGLRAAARK

RhERV1a#181

PLREIGPPDDTGIPRLQYWPFSTSDLYNWKTQSARFSDNPKDLLALLDSVMFTHQPT  
WDDCQQLLRILFTTEERERIQVEARKLVLGDDGQPTANPDLINATFPLTRPAWDYNT  
AEGRGRLLCLYRQTLMAGLRAAARK

RhERV1b (consensus)

PLREIGSLDDTGLSRLMYWPFSTSDLYNWKSQNARFSDNPKDLTSLLD SVMFTHQPT  
WDDCQQLLRILFTTEERERIQVEARKLVPGDDGQPTANPDLINAAFPLTRPRWDYNT  
AEGRGRLLIYRQTLMAGLRAAARK

RhERV1b#67

PLREIGSLDDTGLSRLMYWPFSTSDLYNWKSQNARFSDNPKDLTLLLD SVMFTHQPT  
WDDCQQLLRILFTTEERERIQVEARKLVPGDDGQPTANPDLINAAFPLTRPRWDYNT  
AEGRGRLLIYRQTLMAGLRAAARK

RhERV1b#75

PLREIGSLDDTGLSRLMYWPFSTSDLYNWKSQNARFSDNPKDLTSLLD SVMFTHQPT  
WDDCQQLLRILFTTEERERIQVEARKLVPGDDGQPTANPDLINVAFPLTRPRWDYNT  
AEGRGRLLIYRQTLMAGLRAAARK

RhERV1b#77

PLREIGSLDDTGLSRLMYWPFSTSDLYNWKSQNARFSDNPKDLTSLLD SVMFTHQPT  
WDDCQQLLRILFTTEERERIQVEARKLVPGDDGQPTANPDLINAAFPLTRPRWDYN  
MAEGRGRLLIYRQTLMAGLRAAARK

RhERV1b#92

PLREIGSFDDTGLSRLMYWPFSTSDLYN\*KSQNARFSDNPKDLTSLLD SVMFTHQPT  
WDDCQQLLRILFTTEERERIQVEARKLVPGDDGQPTANPDLINAAFPLTRPRWDYNT  
AEGRGRLLIYRQTLMAGLRAAARK

CERV2 (consensus)

PLRTVNRTVQYWPFASDLYNWKTHNPPFSQDPQALTALIESILLTHQPTWDDCQQ  
LLQVLLTTEERQRVLLLEARKHVPGPGGLPTQLPNEIDEGFPLTRPDWDYETASGRESLR  
IYRQALLAGLKGAGKR

CERV2#32

PLRTVNRTVQYWPFASDLYNWKTHNPPFSQDPQALTSLIESILLTHQPTWDDCQQ  
LLQVLLTTEERQRVLLLEARKNVPGPGGLPTQLPNEIDEGFPLTRLDWDYETATGRESLR  
IYRQALLAGLKGAGKR

RhERV2 (consensus)

PLRTVNRTVQYWPFASDLYNWKTHNPSFSQDPQALTSLIESILLTHQPTWDDCQQ  
LLQVLLTTEERQRVLLLEARKNVPGPGGLPTQLPNEIDEGFPLTRPDWDYETAPGRESLR  
IYRQALLAGLKGAGKR

RhERV2#53

PLRTVNRTVQYWPFASDLYNWKTHNPSFSQDPQALTSLIESILLTHQPTWDDCQQ  
LLQVLLTTEERQRVLLLEARKNVPGPGGLPTQLPNEIDEGFPLTRPDWDYETAPGRESLR  
IYCQALLAGLKGAGKR

RhERV2#55

PLRTVNRTVQYWPFASDLYNWKTHNPSFSQDPQALTSLIESILLTHQPTWDDCQQ  
LLQVLLTTEERQRVLLLEARKNVPGPGGLPTQLPNEIDEGFPLTRPDWDYEMAPGRESL  
RIYRQALLAGLKGAGKR

RhERV2#58

PLRTVNRTVQYWPFASDLYNWKTHNPSFSQDPQALTSLIESILLTHQPTWDDCQQ  
LLQVLLTTEERQQVLLLEARKNVPGPGGLPTQLPNKIDEGFPLTRPDWDYETAPGKESL  
QIYRQALLAGLKGAGKR

RhERV2#63

PLRTVNRTVQYWPFASDLYNWKTHNPSFSQDPQALTSLIESILLTHQPTWDDCQQ  
LLQVLLTTEERQRVLLEARKNVPGPGGLPTQLPNEIDEGFPLTRPDWDYETAPGRESLR  
IYRQALLAGLKGAGKC

RhERV2#76

PLRTVNRTVQYWPFASDLYNWKTHNPSFSQDPQALTSLIESILLTHQPTWDDCQQ  
LLQVLLTTEERQRVLLEARKNVPGPGGLPTQLPNEIDEGFPLTRPDWDYETAPGRESLR  
IYHQALLAGLKGAGKR

RhERV2#91

PLRTVNRTVQYWPFASDLYNWKTHNPSFSQDPQALTSLIESILLTHQPTWDDCQQ  
LLQVLLTTEERQRVLLEARKNVPGPGGLPTQLPNEIDEGFPLTRPDWDYETAPGRESLR  
IYRQALLAGLKGAGKH

RhERV2#98

PLRTVNRTVQYWPFASDLYNWKTHNPSFSQDPQALTSLIESILLTHQPTWDDCQQ  
LLQVLLTTEERQRVLLEARKNVPGPGGLPTQLPNEIDEGFPLTHPDWDYETAPGRESL  
RIYRQALLAGLKGAGKR

RhERV2 E91K

PLRTVNRTVQYWPFASDLYNWKTHNPSFSQDPQALTSLIESILLTHQPTWDDCQQ  
LLQVLLTTEERQRVLLEARKNVPGPGGLPTQLPNKIDEGFPLTRPDWDYETAPGRESL  
RIYRQALLAGLKGAGKR

enMLV(consensus)

PLRMGGDGQLQYWPFSSDLYNWKNNNPSFSEDPGKLTALIESVLITHQPTWDDC  
QQLLGTLLTGEEKQRVLLEARKAVRGNDGRPTQLPNEVNAAFPLERPDWDYTTTEGR  
NHLVLYRQLLLAGLQNAGRS

enMLV#109

PLRMGGDGQLQYWPFSSDLYNWKNNNPSFSEDPGKLTALIESVLITHQPTWDDC  
QQLLGTLLTGEEKQRVLLEARKAVRGNDGRPTQLPNEINAAFPLERPDWDYTTTEGR  
NHLVLYRQLLLAGLQNAGRS

enMLV#111

PLRMGGDGQLQYWPFSDDLWNWKNNNPSFSDPGKLTALIESVLITHQPTWDDC  
QQLLGTLLTGEEKQRVLLLEARKAVRGNDGRPTQLPNEVNAAFPLERPGWDYTTTEGR  
NHLVLYRQLLLGLQAGLNAGRS

enMLV#116

PLRMGGDGQLQYWPFSDDLWNWKNNNPSFSDPGKLTALIESVLITHQPTWDDC  
QQLLGTLLTGEEKQRVLLLEARKAVRGNDGRPTQLPNEVNAAFPLERPDWDYTTTEGR  
NHLVLYRQLLLGLQAGLNAGRS

enMLV#124

PLRMGRDGQLQYWPFSDDLWNWKNNNPSFSDPGKLTALIESVLITHQPTWDDCQ  
QQLLGTLLTGEEKQRVLLLEARKAVRGNDGRPTQLPNEVNAAFPLERPGWDYTTTEGRN  
HLVLYRQLLLGLQAGLNAGRS

enMLV#127

PLRMGGDGQLQYWPFSDDLWNWKNNNPSFSDPGKLTALIESVLITHQPTWDDC  
QQLLGTLLTGEEKQRVLLLEARKAVRGDDGRPTQLPNEVNAAFPLERPGWDYTTTEGR  
NHLVLYRQLLLGLQAGLNAGRS

Complete CA sequences

CERV1(consensus)

PLREIGPPDDTGIPRLQYWPFSDDLWNWKTQSARFSDNPKDLLALLDSVMFTHQPT  
WDDCQQLLRILFTTEERERIEARKLVPGDDGQPTANPDLINATFPLTRPAWDYNT  
AEGRGRHLHYRQTLMAGLRAAARKPTNLAKVYSILQGKTESPATYLERLMEAFRQYTP  
IDPEAPGSQAAVVMSFVNQAAPDIKRKLQKLEDLEGKRIQDLLQIAQRVYNNRDTPE  
EKQFKATEKMTKVL

CERV1(ancestral)

PLREIGPPDDTGIPRLQYWPFSDDLWNWKTQSAQFSDNPKDLLALLDSVMFTHQPT  
WDDCQQLLRILFTTEERERIEARKLVPGDDGQPTANPDLINATFPLTRPAWDYNT  
AEGRGRHLHYRQTLMAGLRAAARKPTNLAKVYSILQGKTESPATYLERLMEAFRQYTP  
IDPEAPGSQAAVVMSFVNQAAPDIKRKLQKLEDLEGKRIQDLLQIAQRVYNNRDTPE  
EKQFKATEKMTKVL
